# Supplementary material
Source: publisher figshare collection journal article supplement (https://frontiersin.figshare.com/ndownloader/files/31764107)
Supplement: Supplementary file 1 [file 31764107]

## Supplementary Material

### 1 Supplementary Figures and Tables

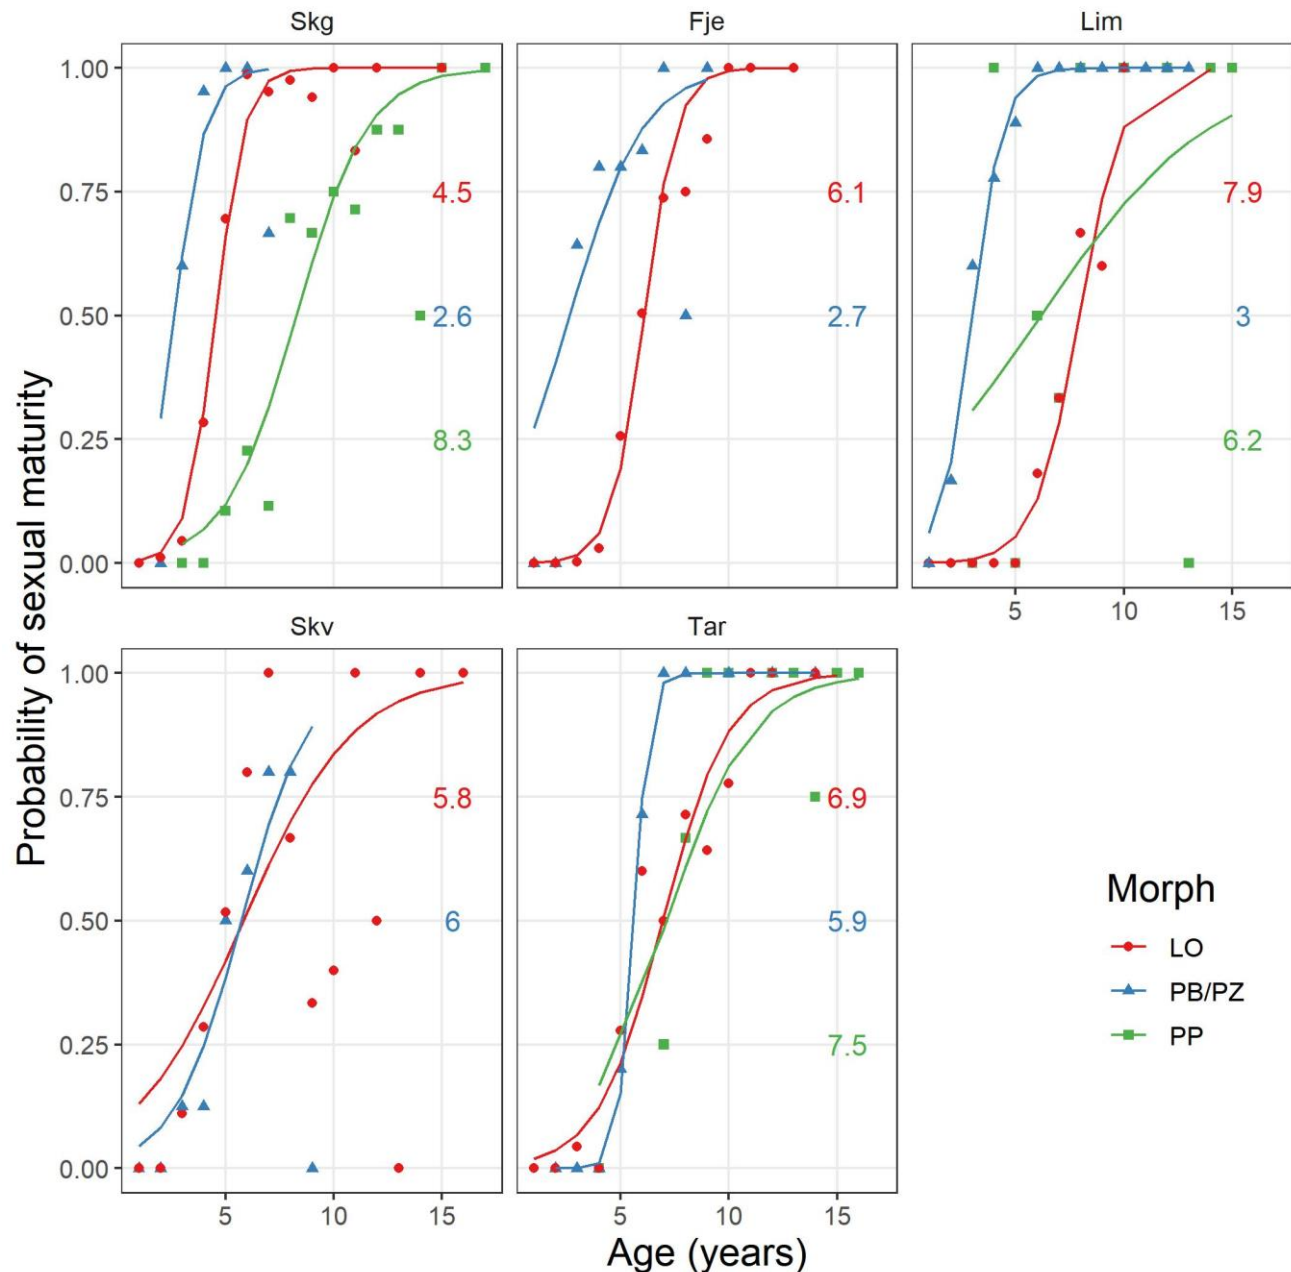

**Supplementary Figure 1.** Logistic regression of probability of sexual maturity at age (years) of Arctic charr morphs from five Norwegian lakes. Abbreviations for lakes are as follow; Skg=Skogsfjordvatn, Fje=Fjellfrøsvatn, Lim=Limingen, Skv=Skøvatn, and Tar=Tårnvatn.
